# Supplementary material
Source: Elsevier journal article supplement (https://www.sciencedirect.com/science/article/pii/S0210480620301510)
Supplement: mmc1 [file S0210480620301510:mmc1.doc]

**Supplementary file 1**

**Scrotal Surgery/Circumcision**: The module was designed to provide to each participant a systematic approach to essential urological emergencies and basic genital procedures. The first part of the training was focused on external genitalia examination, trouble-shooting in urethral catheterization, management of priapism, paraphimosis and supra-pubic bladder catheterization on a dedicated module (Limbs and Things, Bristol, UK ®). After, practical hands-on training on bull’s scrotum was used for scrotal exploration, testicular fixation and hydrocele repair. Another penile model (Limbs and Things, Bristol, UK ®) allowed trainees to perform a circumcision as already validated in a previous study [1].

**Bowel Anastomosis**: Trainees were asked to perform a simple bowel anastomosis followed by the creation of a stoma and ureteral reimplantation on a pig model. In addition, trainees had the opportunity to practice more complex surgical techniques of Bricker and Wallace uretero-intestinal anastomotic techniques.

**Laparoscopy**: Since the introduction of laparoscopic surgery in the late 90’s, dedicated training programs to deliver essential technical skills were presented from different surgical institutions [2,3]. Firstly, introduced in 2013, the European Basic Laparoscopic Urological Skills (E-BLUS) examination became increasingly popular amongst urology residents as it tests, through four validated tasks, an important part of basic urologic laparoscopic skills [4]. From this successful experience, the Urology Boot Camp gives to all participants the possibility to practice those basic laparoscopic tasks on dry lab simulators. Moreover, after having successfully accomplished E-BLUS exercises, a virtual-reality simulator (LapMentor®) allowed trainees to perform some steps of radical nephrectomy. The laparoscopic skills section included presentation of the laparoscopic instruments and their use, the practice of peritoneal access techniques on a model, port placement for renal and prostate surgery.

**Robotics**: As the use of robotic surgery is getting increasing popularity in the most advanced urologic departments, since 2018 Boot Camp edition a robotic surgery simulator was included in the technical tasks program. The aim of simulators is to enable the trainee to reproduce or represent under test conditions a phenomenon likely to occur in real-life surgery any number of times, without risking on patients. Most of the virtual reality simulators deliver technical skills training as cutting, depth perception, hand–eye coordination, suturing and retraction [5]. The most modern simulators include virtual reality simulation of many surgical procedures, divided in a step-by-step fashion with video guidance and can also reproduce emergency situations and complications. At the end of the task, the trainee has a dedicated report where all technical parameters are objectively evaluated with the possibility to build a learning curve graph [6].

**Cystoscopy / Trans Urethral Resection Bladder Tumour**: Transurethral surgery is an exclusive domain for urologists; mastering the craft is therefore crucial for the urological daily life. One aspect of the module involved a detailed teaching session on the endourological armamentarium. Trainees were trained in wet-lab models with the possibility to practice on real-life instruments and also to perform bladder clot evacuation on a dedicated simulator and on virtual reality simulators for bladder resection, with increasing levels of skills: from a cystoscopy in a healthy bladder, to transurethral resection of a little and bloodless bladder tumour to the resection of a huge and haemorrhagic neoplasm.

**Trans Urethral Resection Prostate**: The module comprised familiarisation with instrument and assembly, irrigation fluids and energy types, description of the resection techniques and anatomical landmarks, description of surgical complications (obturator reflex, bladder perforation, bladder tamponade, TURP syndrome, prostate capsule perforation), methods to avoid them and their management. Similar to TURBT module, Transurethral resection of the prostate is one of the most commonly performed intervention of benign prostatic enlargement. The expanding medical literature in this field and the rapid technological improvements in this field pose surgical training as a first-line objective for the next generation of urologists. The training consists both in physical simulators in the form of synthetic benches, animal and computer-based virtual reality simulators. As the first can provide the direct sensation of resecting prostatic tissue with real-life instruments, the second (TURPMentor®) faces the trainee to the principal pitfalls of the technique (i.e. bleeding control, risk of creating false planes and so on).

**Ureteroscopy**: The second endoscopy module in the course covered the basics of cystoscopy and ureteral stent insertion, techniques and instrumentation of rigid and flexible ureteroscopy (different types of ureteroscopes, laser settings, guidewires, stents, ureteral catheters, baskets and optics). Scenarios of cystoscopy, stent insertion, laser disintegration and stone extraction were performed on models and virtual reality simulators. Technical skills were provided through dedicated benchtop models with real-life instruments and virtual reality models such as the UroMentor® system [7]. Moreover, flexible ureteroscopes were available for getting practice into the K-box® model.

**The functional urology module TVT/Botox**: The session consisted of a first theoretical course followed by practical hands-on training in performing a female pelvis examination, intravesical botulinum toxin injections, urethral bulking agents (Bulkamid®), mid-urethral tapes and practical urodynamics curve interpretation.

**Non-technical skills**: In the simulation ward round module participants were given a handover list and asked to take part and lead a ward round in a high-fidelity ward scenario with actors, medical records, imaging scans, and a team of a nurse and a junior doctor accompanying them. Distractions were staged such as phone calls or patient relatives requiring medical information. Trainees were called to emergency scenarios such as ischemic priapism and difficult catheterization and were asked to manage the conditions on models. A debriefing session with the participants, observers, actors and faculty members followed including participant feedback, discussion and reflections for future practice.

**References**

1. Campain NJ, Parnham AS, Spasojevic N, Reeves F, Venn S, Biyani CS. Use of a Simulated Model to Teach Male Adult Circumcision in Sub-Saharan Africa. World J Surg. 2017 Jan;41(1):10-13

Fried GM, Feldman LS, Melina CV, et al. Proving the value of simulation in laparoscopic surgery. Ann Surg 2004;240:528–528

Sweet RM, Beach R, Sainfort F, Gupta P, Reihsen T, Poniatowski LH, McDougall EM. Introduction and validation of the American Urological Association Basic Laparoscopic Urologic Surgery skills curriculum. J Endourol. 2012 Feb;26(2):190-6.

1. Brinkman WM, Tjiam IM, Schout BM, Muijtjens AM, Van Cleynenbreugel B, Koldewijn EL, Witjes JA. Results of the European Basic Laparoscopic Urological Skills examination.Eur Urol. 2014 Feb;65(2):490-6.

Kumar A, Smith R, Patel VR. Current status of robotic simulators in acquisition of robotic surgical skills. Curr Opin Urol. 2015 Mar;25(2):168-74.

Korets R, Mues AC, Graversen J, et al. Comparison of robotic surgery skill acquistion between DV-Trainer and da-Vinci surgical system: a randomized controlled study. J Urol 2011; 185:e593.

Michel MS, Knoll T, Kohrmann KU, Alken P. The URO Mentor: development and evaluation of a newcomputer-based interactive training system for virtual lifelike simulation of diagnostic and therapeutic endourological procedures. BJU Int. 2002;89(3):174-177.

**Supplementary file 2**

**Overseas Participants Survey**

1. **Was the course relevant for you as a non-UK trainee?**

Strongly Agree Agree Neutral Disagree Strongly Disagree

1. **What was the most challenging aspect being a non-UK trainee during the boot camp?**

Comments-

1. **After returning to your own hospital, do you feel that your operating skills have improved?**

Strongly Agree Agree Neutral Disagree Strongly Disagree

1. **After returning to your own hospital, do you feel that your non-technical skills have improved?**

Strongly Agree Agree Neutral Disagree Strongly Disagree

1. **How did you use the feedback you received during the course?**
2. **How did you use the feedback you received post-course?**
3. **Did the feedback match to your self-assessment?**

Strongly Agree Agree Neutral Disagree Strongly Disagree

1. **Has your course feedback made a behavioural change in your clinical everyday life?**

Strongly Agree Agree Neutral Disagree Strongly Disagree

1. **Is there anything else about the course that you would like to tell?**

Comments-

1. **I enjoyed the boot camp and would recommend it to a non-UK trainee**

Strongly Agree Agree Neutral Disagree Strongly Disagree

**Supplementary file 3**

**What was the most challenging aspect being a non-UK trainee during the boot camp?**):

*“I would say soft skills and simulation training are not as developed in the European continent medical schools and training programs as in the UK, so that represented a bit of a novelty and a challenge. “*

*“Language skills in the non-technical simulation training, including medical abbreviations “*

*“Testing of non-technical skills. This aspect is not considered in my national training and I felt it really important to test your reactions in an emergency scenario, improving the mental process that you have to perform in those possible “real-life” situations”.*

*“Biggest challenge was being inexperienced. Otherwise the Australian approach to Urology is very similar and our medical system is structured similarly.”*

“*To fit in with the UK trainees.”*

*“technical approaches”*

*“foreign language, especially medical (urological) terms. differences in health care system understanding”*

*“The communication skills in a non-mother tongue.”*

**How did you use the feedback you received during the course?**

*“To improve my technical and non-technical skills”*

*“Fantastic feedback with 1 on 1 consultant time during technical skills which i applied in the operating field in Australia. The non-technical feedback was also fantastic and i use the tips i received in my day to day interactions during ward round/clinics.”*

*“I emphasized training the skills I had more difficulties with during the program, including dry lab training.“*

*“Pre-test theoretical knowledges survey.”*

*“To systematize procedures.”*

*“Appreciated good technical as well as non-technical advice.”*

*“Used it to improve my weaknesses and work harder.”*

*“I really use the feedback, especially the surgery modules.”*

*“When I did the procedures in the dry lab again, I used the feedback to improve.”*

**How did you use the feedback you received post-course?**

*“To especially focus on my weaker areas.”*

*“I used the feedback from the post course to assess my weak areas. For e.g, laparoscopy skills were a weak area which i was able to work on when i came back to Australia.”*

*“I reflected on the aspects mentioned and tried to take them into account in practice, including technical and soft skills aspects. “*

*“It was interesting to see how much I retain from theoretical lessons.”*

*“To focus more in some lacking areas.”*

*“I interpreted it as a help to improve my weaker skills.”*

*“Used it to improve my practice.”*

*“I focused on what I was doing well and was conscious of my weak areas, I was giving more attention and working on my weaknesses in clinical practice back home.”*

**Is there anything else about the course that you would like to tell?**

*“Excellent course.”*

*“It was a great week of learning and the technical and non-technical skills I learned I have applied to my day to day clinical practice in Urology. Highly relevant to Urology Practice in Australia.”*

*“The course was a highlight in my formation as a trainee. The one-one contact with very knowledgeable, experienced and approachable faculty members was very valuable for my education.”*

*“The possibility to have a one-to-one interaction with a tutor was amazing. It gives you the possibility to focus on particular technical details, proportionally to knowledge and skills of each participant.”*

*“Excellent trainer team! Thanks a lot!”*

*“Only minor aspect of recommendation would be to improve lunch and snacks.”*

*“The one-one training was amazing, instant feedback. No doubt about my improvement in both technical and non-technical skills due to this course. Highly relevant for me.”*
